# Supplementary material
Source: publisher figshare collection journal article supplement (https://springernature.figshare.com/ndownloader/files/12384074)
Supplement: Supplementary file 1 [file 12384074]

## Sheet: cartilaginous_latest.csv
Order	Family	Genus	Species	Subspecies	Genus_Species	Sample size	Sex	Method	Body mass (g)	Body mass S.D.	Brain mass (g)	Brain mass S.D.	Age Class	Locality	Species Name in original article	Reference	Remark
Carcharhiniformes	Carcharhinidae	Carcharhinus	acronotus		Carcharhinus_acronotus	1	unkwon	Mass	3630		8.35		unknown			Myagkov NA (1991) J Hinforsch 32:553-561
Carcharhiniformes	Carcharhinidae	Carcharhinus	albimarginatus		Carcharhinus_albimarginatus	1	unkwon	Mass	5000		24.792		unknown	Australia		Bauchot R et al (1995) Cybium 19:153-165
Carcharhiniformes	Carcharhinidae	Carcharhinus	amblyrhynchos		Carcharhinus_amblyrhynchos	5	unkwon	Mass	25540	16500	35.28	4.45	adult			Yopak KE et al (2007) Brain Behav Evol 69:280-300
Carcharhiniformes	Carcharhinidae	Carcharhinus	brachyurus		Carcharhinus_brachyurus	1	unkwon	Mass	2185		9.14		Juvenile			Yopak KE et al (2007) Brain Behav Evol 69:280-300
Carcharhiniformes	Carcharhinidae	Carcharhinus	falciformis		Carcharhinus_falciformis	1	unkwon	Mass	36240		43.32		unknown			Northcutt RG (1977) Am Zool 17:411-429
Carcharhiniformes	Carcharhinidae	Carcharhinus	falciformis		Carcharhinus_falciformis	1	unkwon	Mass	97960		51.84		adult			Yopak KE et al (2007) Brain Behav Evol 69:280-300
Carcharhiniformes	Carcharhinidae	Carcharhinus	isodon		Carcharhinus_isodon	1	unkwon	Mass	10870		18.75		unknown			Northcutt RG (1977) Am Zool 17:411-429
Carcharhiniformes	Carcharhinidae	Carcharhinus	leucas		Carcharhinus_leucas	1	unkwon	Mass	83800		54.36		unknown			Northcutt RG (1977) Am Zool 17:411-429
Carcharhiniformes	Carcharhinidae	Carcharhinus	leucas		Carcharhinus_leucas	1	unkwon	Mass	72850		42.31		adult			Yopak KE et al (2007) Brain Behav Evol 69:280-300
Carcharhiniformes	Carcharhinidae	Carcharhinus	limbatus		Carcharhinus_limbatus	1	unkwon	Mass	39500		22.01		unknown			Myagkov NA (1991) J Hinforsch 32:553-561
Carcharhiniformes	Carcharhinidae	Carcharhinus	longimanus		Carcharhinus_longimanus	1	unkwon	Mass	40000		35.4		unknown			Northcutt RG (1978) Brain organization in the cartilaginous fishes. In: Sensory Biology of Sharks, Skates, and Rays (Hodgson ES, Mathewson RF, eds), pp 117-194. Arlington, VA: Office of Naval Research
Carcharhiniformes	Carcharhinidae	Carcharhinus	melanopterus		Carcharhinus_melanopterus	1	unkwon	Mass	1075		8.006		unknown	Enewetak Atoll		Bauchot R et al (1995) Cybium 19:153-165
Carcharhiniformes	Carcharhinidae	Carcharhinus	melanopterus		Carcharhinus_melanopterus	1	unkwon	Mass	7650		17.93		adult			Yopak KE et al (2007) Brain Behav Evol 69:280-300
Carcharhiniformes	Carcharhinidae	Carcharhinus	obscurus		Carcharhinus_obscurus	1	unkwon	Mass	12000		20.757		unknown	Reunion		Bauchot R et al (1976) Copeia 2:305-310
Carcharhiniformes	Carcharhinidae	Carcharhinus	plumbeus		Carcharhinus_plumbeus	1	unkwon	Mass	16400		21.86		Sub-adult			Yopak KE et al (2007) Brain Behav Evol 69:280-300
Carcharhiniformes	Carcharhinidae	Galeocerdo	cuvier		Galeocerdo_cuvier	1	unkwon	Mass	148600		19.85		adult			Yopak KE et al (2007) Brain Behav Evol 69:280-300
Carcharhiniformes	Carcharhinidae	Negaprion	acutidens		Negaprion_acutidens	1	unkwon	Mass	1740		10.41		Juvenile			Yopak KE et al (2007) Brain Behav Evol 69:280-300
Carcharhiniformes	Carcharhinidae	Negaprion	brevirostris		Negaprion_brevirostris	1	unkwon	Mass	14250		14.03		unknown			Myagkov NA (1991) J Hinforsch 32:553-561
Carcharhiniformes	Carcharhinidae	Prionace	glauca		Prionace_glauca	7	unkwon	Mass	75370	3860	18.83	4.3	adult			Yopak KE et al (2007) Brain Behav Evol 69:280-300
Carcharhiniformes	Carcharhinidae	Rhizoprionodon	acutus		Rhizoprionodon_acutus	1	unkwon	Mass	3375		13.225		unknown	Australia		Bauchot R et al (1995) Cybium 19:153-165
Carcharhiniformes	Carcharhinidae	Rhizoprionodon	porosus		Rhizoprionodon_porosus	1	unkwon	Mass	3750		7.18		unknown			Myagkov NA (1991) J Hinforsch 32:553-561
Carcharhiniformes	Carcharhinidae	Triaenodon	obesus		Triaenodon_obesus	1	unkwon	Mass	13700		20.06		unknown	Enewetak Atoll		Bauchot R et al (1995) Cybium 19:153-165
Carcharhiniformes	Carcharhinidae	Triaenodon	obesus		Triaenodon_obesus	2	unkwon	Mass	16300		15.36		adult			Yopak KE et al (2007) Brain Behav Evol 69:280-300
Carcharhiniformes	Hemigaleidae	Hemigaleus	microstoma		Hemigaleus_microstoma	2	unkwon	Mass	2330		5.17		adult			Yopak KE et al (2007) Brain Behav Evol 69:280-300
Carcharhiniformes	Pseudotriakidae	Gollum	attenuatus		Gollum_attenuatus	2	unkwon	Mass	1045		2.78		adult			Yopak KE and Montgomery JC (2008) Brain Behav Evol 71:287-304
Carcharhiniformes	Scyliorhinidae	Apristurus	sinensis		Apristurus_sinensis	2	unkwon	Mass	1450		2.78785		adult			Yopak KE and Montgomery JC (2008) Brain Behav Evol 71:287-304
Carcharhiniformes	Scyliorhinidae	Asymbolus	analis		Asymbolus_analis	1	unkwon	Mass	320		0.94		adult			Yopak KE et al (2007) Brain Behav Evol 69:280-300
Carcharhiniformes	Scyliorhinidae	Asymbolus	rubiginosus		Asymbolus_rubiginosus	1	unkwon	Mass	260		0.8		adult			Yopak KE et al (2007) Brain Behav Evol 69:280-300
Carcharhiniformes	Scyliorhinidae	Cephaloscyllium	isabellum		Cephaloscyllium_isabellum	3	unkwon	Mass	1250	1350	1.38	0.39	adult			Yopak KE et al (2007) Brain Behav Evol 69:280-300
Carcharhiniformes	Scyliorhinidae	Cephaloscyllium	laticeps		Cephaloscyllium_laticeps	3	unkwon	Mass	180	60	0.57	0.12	Juvenile			Yopak KE et al (2007) Brain Behav Evol 69:280-300
Carcharhiniformes	Scyliorhinidae	Figaro	boardmani		Figaro_boardmani	3	unkwon	Mass	200	40	0.87	0.09	adult			Yopak KE et al (2007) Brain Behav Evol 69:280-300
Carcharhiniformes	Scyliorhinidae	Galeus	melastomus		Galeus_melastomus	1	unkwon	Mass	950		2.538		unknown			Bauchot R et al (1995) Cybium 19:153-165
Carcharhiniformes	Scyliorhinidae	Galeus	polli		Galeus_polli	1	unkwon	Mass	160		0.76		unknown			Myagkov NA (1991) J Hinforsch 32:553-561
Carcharhiniformes	Scyliorhinidae	Halaelurus	dawsoni		Halaelurus_dawsoni	1	unkwon	Mass	200		0.8381		adult			Yopak KE and Montgomery JC (2008) Brain Behav Evol 71:287-304
Carcharhiniformes	Scyliorhinidae	Poroderma	pantherinum		Poroderma_pantherinum	1	unkwon	Mass	1050		2.07		unknown			Myagkov NA (1991) J Hinforsch 32:553-561
Carcharhiniformes	Scyliorhinidae	Scyliorhinus	canicula		Scyliorhinus_canicula	1	unkwon	Mass	576.5		1.378		unknown	Britany		Bauchot R et al (1976) Copeia 2:305-310
Carcharhiniformes	Scyliorhinidae	Scyliorhinus	canicula		Scyliorhinus_canicula	1	unkwon	Mass	1380		0.57		unknown			Northcutt RG (1977) Am Zool 17:411-429
Carcharhiniformes	Scyliorhinidae	Scyliorhinus	canicula		Scyliorhinus_canicula	22	unkwon	Mass	660		1.47		unknown			Ridet JM et al. (1973) C. r. hebd. Seanc. Acad. Sci. Paris 276:1437-1440
Carcharhiniformes	Scyliorhinidae	Scyliorhinus	stellaris		Scyliorhinus_stellaris	1	unkwon	Mass	3250		2.85		unknown	Roscoff		Bauchot R et al (1976) Copeia 2:305-310
Carcharhiniformes	Sphyrnidae	Sphyrna	lewini		Sphyrna_lewini	1	unkwon	Mass	55710		59.88		unknown			Northcutt RG (1977) Am Zool 17:411-429
Carcharhiniformes	Sphyrnidae	Sphyrna	lewini		Sphyrna_lewini	1	unkwon	Mass	25000		47.03		adult			Yopak KE et al (2007) Brain Behav Evol 69:280-300
Carcharhiniformes	Sphyrnidae	Sphyrna	mokarran		Sphyrna_mokarran	1	unkwon	Mass	148500		99.14		adult			Yopak KE et al (2007) Brain Behav Evol 69:280-300
Carcharhiniformes	Sphyrnidae	Sphyrna	zygaena		Sphyrna_zygaena	1	unkwon	Mass	63500		71.0395		unknown	Reunion		Bauchot R et al (1976) Copeia 2:305-310
Carcharhiniformes	Sphyrnidae	Sphyrna	zygaena		Sphyrna_zygaena	1	unkwon	Mass	17500		49.688		unknown	Reunion		Bauchot R et al (1995) Cybium 19:153-165
Carcharhiniformes	Triakidae	Galeorhinus	galeus		Galeorhinus_galeus	1	unkwon	Mass	4700		10.281		unknown	North Sea		Bauchot R et al (1995) Cybium 19:153-165
Carcharhiniformes	Triakidae	Galeorhinus	galeus		Galeorhinus_galeus	3	unkwon	Mass	12180	8800	10.38	3.98	adult			Yopak KE et al (2007) Brain Behav Evol 69:280-300
Carcharhiniformes	Triakidae	Mustelus	antarcticus		Mustelus_antarcticus	1	unkwon	Mass	581		3.84		Juvenile			Yopak KE et al (2007) Brain Behav Evol 69:280-300
Carcharhiniformes	Triakidae	Mustelus	asterias		Mustelus_asterias	1	unkwon	Mass	800		3.088		unknown	North Sea		Bauchot R et al (1995) Cybium 19:153-165
Carcharhiniformes	Triakidae	Mustelus	canis		Mustelus_canis	1	f	Mass	71.7		0.83		unknown			Kellicot WE (1908) Am. J. Anat. 8:319-354
Carcharhiniformes	Triakidae	Mustelus	canis		Mustelus_canis	1	f	Mass	75		1.02		unknown			Kellicot WE (1908) Am. J. Anat. 8:319-354
Carcharhiniformes	Triakidae	Mustelus	canis		Mustelus_canis	1	f	Mass	83.1		0.84		unknown			Kellicot WE (1908) Am. J. Anat. 8:319-354
Carcharhiniformes	Triakidae	Mustelus	canis		Mustelus_canis	1	f	Mass	84		0.905		unknown			Kellicot WE (1908) Am. J. Anat. 8:319-354
Carcharhiniformes	Triakidae	Mustelus	canis		Mustelus_canis	1	f	Mass	152.1		1.07		unknown			Kellicot WE (1908) Am. J. Anat. 8:319-354
Carcharhiniformes	Triakidae	Mustelus	canis		Mustelus_canis	1	f	Mass	159.5		1.1		unknown			Kellicot WE (1908) Am. J. Anat. 8:319-354
Carcharhiniformes	Triakidae	Mustelus	canis		Mustelus_canis	1	f	Mass	160		1.07		unknown			Kellicot WE (1908) Am. J. Anat. 8:319-354
Carcharhiniformes	Triakidae	Mustelus	canis		Mustelus_canis	1	f	Mass	189		1.27		unknown			Kellicot WE (1908) Am. J. Anat. 8:319-354
Carcharhiniformes	Triakidae	Mustelus	canis		Mustelus_canis	1	f	Mass	189		1.39		unknown			Kellicot WE (1908) Am. J. Anat. 8:319-354
Carcharhiniformes	Triakidae	Mustelus	canis		Mustelus_canis	1	f	Mass	209		1.42		unknown			Kellicot WE (1908) Am. J. Anat. 8:319-354
Carcharhiniformes	Triakidae	Mustelus	canis		Mustelus_canis	1	f	Mass	217.5		1.155		unknown			Kellicot WE (1908) Am. J. Anat. 8:319-354
Carcharhiniformes	Triakidae	Mustelus	canis		Mustelus_canis	1	f	Mass	220.8		1.315		unknown			Kellicot WE (1908) Am. J. Anat. 8:319-354
Carcharhiniformes	Triakidae	Mustelus	canis		Mustelus_canis	1	f	Mass	221		1.285		unknown			Kellicot WE (1908) Am. J. Anat. 8:319-354
Carcharhiniformes	Triakidae	Mustelus	canis		Mustelus_canis	1	f	Mass	251.4		1.35		unknown			Kellicot WE (1908) Am. J. Anat. 8:319-354
Carcharhiniformes	Triakidae	Mustelus	canis		Mustelus_canis	1	f	Mass	259.7		1.4		unknown			Kellicot WE (1908) Am. J. Anat. 8:319-354
Carcharhiniformes	Triakidae	Mustelus	canis		Mustelus_canis	1	f	Mass	269.5		1.37		unknown			Kellicot WE (1908) Am. J. Anat. 8:319-354
Carcharhiniformes	Triakidae	Mustelus	canis		Mustelus_canis	1	f	Mass	308.5		1.385		unknown			Kellicot WE (1908) Am. J. Anat. 8:319-354
Carcharhiniformes	Triakidae	Mustelus	canis		Mustelus_canis	1	f	Mass	345.5		1.54		unknown			Kellicot WE (1908) Am. J. Anat. 8:319-354
Carcharhiniformes	Triakidae	Mustelus	canis		Mustelus_canis	1	f	Mass	352.5		1.45		unknown			Kellicot WE (1908) Am. J. Anat. 8:319-354
Carcharhiniformes	Triakidae	Mustelus	canis		Mustelus_canis	1	f	Mass	390.7		1.96		unknown			Kellicot WE (1908) Am. J. Anat. 8:319-354
Carcharhiniformes	Triakidae	Mustelus	canis		Mustelus_canis	1	f	Mass	441.4		2.44		unknown			Kellicot WE (1908) Am. J. Anat. 8:319-354
Carcharhiniformes	Triakidae	Mustelus	canis		Mustelus_canis	1	f	Mass	485		1.81		unknown			Kellicot WE (1908) Am. J. Anat. 8:319-354
Carcharhiniformes	Triakidae	Mustelus	canis		Mustelus_canis	1	f	Mass	513.5		2.36		unknown			Kellicot WE (1908) Am. J. Anat. 8:319-354
Carcharhiniformes	Triakidae	Mustelus	canis		Mustelus_canis	1	f	Mass	513.7		2.33		unknown			Kellicot WE (1908) Am. J. Anat. 8:319-354
Carcharhiniformes	Triakidae	Mustelus	canis		Mustelus_canis	1	f	Mass	525		2.28		unknown			Kellicot WE (1908) Am. J. Anat. 8:319-354
Carcharhiniformes	Triakidae	Mustelus	canis		Mustelus_canis	1	f	Mass	527.5		2.56		unknown			Kellicot WE (1908) Am. J. Anat. 8:319-354
Carcharhiniformes	Triakidae	Mustelus	canis		Mustelus_canis	1	f	Mass	550.3		2.315		unknown			Kellicot WE (1908) Am. J. Anat. 8:319-354
Carcharhiniformes	Triakidae	Mustelus	canis		Mustelus_canis	1	f	Mass	552.7		2.46		unknown			Kellicot WE (1908) Am. J. Anat. 8:319-354
Carcharhiniformes	Triakidae	Mustelus	canis		Mustelus_canis	1	f	Mass	555		2		unknown			Kellicot WE (1908) Am. J. Anat. 8:319-354
Carcharhiniformes	Triakidae	Mustelus	canis		Mustelus_canis	1	f	Mass	561.5		2.325		unknown			Kellicot WE (1908) Am. J. Anat. 8:319-354
Carcharhiniformes	Triakidae	Mustelus	canis		Mustelus_canis	1	f	Mass	574		2.35		unknown			Kellicot WE (1908) Am. J. Anat. 8:319-354
Carcharhiniformes	Triakidae	Mustelus	canis		Mustelus_canis	1	f	Mass	630.5		2.23		unknown			Kellicot WE (1908) Am. J. Anat. 8:319-354
Carcharhiniformes	Triakidae	Mustelus	canis		Mustelus_canis	1	f	Mass	747		2.53		unknown			Kellicot WE (1908) Am. J. Anat. 8:319-354
Carcharhiniformes	Triakidae	Mustelus	canis		Mustelus_canis	1	f	Mass	771		2.42		unknown			Kellicot WE (1908) Am. J. Anat. 8:319-354
Carcharhiniformes	Triakidae	Mustelus	canis		Mustelus_canis	1	f	Mass	809.4		2.38		unknown			Kellicot WE (1908) Am. J. Anat. 8:319-354
Carcharhiniformes	Triakidae	Mustelus	canis		Mustelus_canis	1	f	Mass	824.4		2.87		unknown			Kellicot WE (1908) Am. J. Anat. 8:319-354
Carcharhiniformes	Triakidae	Mustelus	canis		Mustelus_canis	1	f	Mass	890.3		2.93		unknown			Kellicot WE (1908) Am. J. Anat. 8:319-354
Carcharhiniformes	Triakidae	Mustelus	canis		Mustelus_canis	1	f	Mass	915.5		2.815		unknown			Kellicot WE (1908) Am. J. Anat. 8:319-354
Carcharhiniformes	Triakidae	Mustelus	canis		Mustelus_canis	1	f	Mass	939.5		3.24		unknown			Kellicot WE (1908) Am. J. Anat. 8:319-354
Carcharhiniformes	Triakidae	Mustelus	canis		Mustelus_canis	1	f	Mass	988		2.97		unknown			Kellicot WE (1908) Am. J. Anat. 8:319-354
Carcharhiniformes	Triakidae	Mustelus	canis		Mustelus_canis	1	f	Mass	995		2.9		unknown			Kellicot WE (1908) Am. J. Anat. 8:319-354
Carcharhiniformes	Triakidae	Mustelus	canis		Mustelus_canis	1	f	Mass	995.5		3		unknown			Kellicot WE (1908) Am. J. Anat. 8:319-354
Carcharhiniformes	Triakidae	Mustelus	canis		Mustelus_canis	1	f	Mass	1000		2.56		unknown			Kellicot WE (1908) Am. J. Anat. 8:319-354
Carcharhiniformes	Triakidae	Mustelus	canis		Mustelus_canis	1	f	Mass	1014		2.88		unknown			Kellicot WE (1908) Am. J. Anat. 8:319-354
Carcharhiniformes	Triakidae	Mustelus	canis		Mustelus_canis	1	f	Mass	1026		3.23		unknown			Kellicot WE (1908) Am. J. Anat. 8:319-354
Carcharhiniformes	Triakidae	Mustelus	canis		Mustelus_canis	1	f	Mass	1042.4		3.13		unknown			Kellicot WE (1908) Am. J. Anat. 8:319-354
Carcharhiniformes	Triakidae	Mustelus	canis		Mustelus_canis	1	f	Mass	1064		3.19		unknown			Kellicot WE (1908) Am. J. Anat. 8:319-354
Carcharhiniformes	Triakidae	Mustelus	canis		Mustelus_canis	1	f	Mass	1073.2		3.11		unknown			Kellicot WE (1908) Am. J. Anat. 8:319-354
Carcharhiniformes	Triakidae	Mustelus	canis		Mustelus_canis	1	f	Mass	1085		3.08		unknown			Kellicot WE (1908) Am. J. Anat. 8:319-354
Carcharhiniformes	Triakidae	Mustelus	canis		Mustelus_canis	1	f	Mass	1086		3.17		unknown			Kellicot WE (1908) Am. J. Anat. 8:319-354
Carcharhiniformes	Triakidae	Mustelus	canis		Mustelus_canis	1	f	Mass	1130		2.93		unknown			Kellicot WE (1908) Am. J. Anat. 8:319-354
Carcharhiniformes	Triakidae	Mustelus	canis		Mustelus_canis	1	f	Mass	1143		3.18		unknown			Kellicot WE (1908) Am. J. Anat. 8:319-354
Carcharhiniformes	Triakidae	Mustelus	canis		Mustelus_canis	1	f	Mass	1145		3.29		unknown			Kellicot WE (1908) Am. J. Anat. 8:319-354
Carcharhiniformes	Triakidae	Mustelus	canis		Mustelus_canis	1	f	Mass	1163.1		3.14		unknown			Kellicot WE (1908) Am. J. Anat. 8:319-354
Carcharhiniformes	Triakidae	Mustelus	canis		Mustelus_canis	1	f	Mass	1176		3.06		unknown			Kellicot WE (1908) Am. J. Anat. 8:319-354
Carcharhiniformes	Triakidae	Mustelus	canis		Mustelus_canis	1	f	Mass	1187		3.575		unknown			Kellicot WE (1908) Am. J. Anat. 8:319-354
Carcharhiniformes	Triakidae	Mustelus	canis		Mustelus_canis	1	f	Mass	1196.5		3.07		unknown			Kellicot WE (1908) Am. J. Anat. 8:319-354
Carcharhiniformes	Triakidae	Mustelus	canis		Mustelus_canis	1	f	Mass	1249		3.455		unknown			Kellicot WE (1908) Am. J. Anat. 8:319-354
Carcharhiniformes	Triakidae	Mustelus	canis		Mustelus_canis	1	f	Mass	1267		3.16		unknown			Kellicot WE (1908) Am. J. Anat. 8:319-354
Carcharhiniformes	Triakidae	Mustelus	canis		Mustelus_canis	1	f	Mass	1295.5		3.36		unknown			Kellicot WE (1908) Am. J. Anat. 8:319-354
Carcharhiniformes	Triakidae	Mustelus	canis		Mustelus_canis	1	f	Mass	1303.5		3.76		unknown			Kellicot WE (1908) Am. J. Anat. 8:319-354
Carcharhiniformes	Triakidae	Mustelus	canis		Mustelus_canis	1	f	Mass	1310.6		3.41		unknown			Kellicot WE (1908) Am. J. Anat. 8:319-354
Carcharhiniformes	Triakidae	Mustelus	canis		Mustelus_canis	1	f	Mass	1312.5		3.66		unknown			Kellicot WE (1908) Am. J. Anat. 8:319-354
Carcharhiniformes	Triakidae	Mustelus	canis		Mustelus_canis	1	f	Mass	1343		3.11		unknown			Kellicot WE (1908) Am. J. Anat. 8:319-354
Carcharhiniformes	Triakidae	Mustelus	canis		Mustelus_canis	1	f	Mass	1352		3.735		unknown			Kellicot WE (1908) Am. J. Anat. 8:319-354
Carcharhiniformes	Triakidae	Mustelus	canis		Mustelus_canis	1	f	Mass	1371		3.66		unknown			Kellicot WE (1908) Am. J. Anat. 8:319-354
Carcharhiniformes	Triakidae	Mustelus	canis		Mustelus_canis	1	f	Mass	1392		3.11		unknown			Kellicot WE (1908) Am. J. Anat. 8:319-354
Carcharhiniformes	Triakidae	Mustelus	canis		Mustelus_canis	1	f	Mass	1412.5		3.21		unknown			Kellicot WE (1908) Am. J. Anat. 8:319-354
Carcharhiniformes	Triakidae	Mustelus	canis		Mustelus_canis	1	f	Mass	1439		3.9		unknown			Kellicot WE (1908) Am. J. Anat. 8:319-354
Carcharhiniformes	Triakidae	Mustelus	canis		Mustelus_canis	1	f	Mass	1440		3.49		unknown			Kellicot WE (1908) Am. J. Anat. 8:319-354
Carcharhiniformes	Triakidae	Mustelus	canis		Mustelus_canis	1	f	Mass	1500		3.27		unknown			Kellicot WE (1908) Am. J. Anat. 8:319-354
Carcharhiniformes	Triakidae	Mustelus	canis		Mustelus_canis	1	f	Mass	1537		3.48		unknown			Kellicot WE (1908) Am. J. Anat. 8:319-354
Carcharhiniformes	Triakidae	Mustelus	canis		Mustelus_canis	1	f	Mass	1538.3		3.95		unknown			Kellicot WE (1908) Am. J. Anat. 8:319-354
Carcharhiniformes	Triakidae	Mustelus	canis		Mustelus_canis	1	f	Mass	1550		3.37		unknown			Kellicot WE (1908) Am. J. Anat. 8:319-354
Carcharhiniformes	Triakidae	Mustelus	canis		Mustelus_canis	1	f	Mass	1575.2		3.43		unknown			Kellicot WE (1908) Am. J. Anat. 8:319-354
Carcharhiniformes	Triakidae	Mustelus	canis		Mustelus_canis	1	f	Mass	1603		3.24		unknown			Kellicot WE (1908) Am. J. Anat. 8:319-354
Carcharhiniformes	Triakidae	Mustelus	canis		Mustelus_canis	1	f	Mass	1617		2.98		unknown			Kellicot WE (1908) Am. J. Anat. 8:319-354
Carcharhiniformes	Triakidae	Mustelus	canis		Mustelus_canis	1	f	Mass	1642		3.72		unknown			Kellicot WE (1908) Am. J. Anat. 8:319-354
Carcharhiniformes	Triakidae	Mustelus	canis		Mustelus_canis	1	f	Mass	1660		3.61		unknown			Kellicot WE (1908) Am. J. Anat. 8:319-354
Carcharhiniformes	Triakidae	Mustelus	canis		Mustelus_canis	1	f	Mass	1688		3.96		unknown			Kellicot WE (1908) Am. J. Anat. 8:319-354
Carcharhiniformes	Triakidae	Mustelus	canis		Mustelus_canis	1	f	Mass	1736.5		3.83		unknown			Kellicot WE (1908) Am. J. Anat. 8:319-354
Carcharhiniformes	Triakidae	Mustelus	canis		Mustelus_canis	1	f	Mass	1737		3.205		unknown			Kellicot WE (1908) Am. J. Anat. 8:319-354
Carcharhiniformes	Triakidae	Mustelus	canis		Mustelus_canis	1	f	Mass	1761		4.05		unknown			Kellicot WE (1908) Am. J. Anat. 8:319-354
Carcharhiniformes	Triakidae	Mustelus	canis		Mustelus_canis	1	f	Mass	1789.5		4.14		unknown			Kellicot WE (1908) Am. J. Anat. 8:319-354
Carcharhiniformes	Triakidae	Mustelus	canis		Mustelus_canis	1	f	Mass	1791		4.06		unknown			Kellicot WE (1908) Am. J. Anat. 8:319-354
Carcharhiniformes	Triakidae	Mustelus	canis		Mustelus_canis	1	f	Mass	1795		3.34		unknown			Kellicot WE (1908) Am. J. Anat. 8:319-354
Carcharhiniformes	Triakidae	Mustelus	canis		Mustelus_canis	1	f	Mass	1795		3.98		unknown			Kellicot WE (1908) Am. J. Anat. 8:319-354
Carcharhiniformes	Triakidae	Mustelus	canis		Mustelus_canis	1	f	Mass	1803.5		4.19		unknown			Kellicot WE (1908) Am. J. Anat. 8:319-354
Carcharhiniformes	Triakidae	Mustelus	canis		Mustelus_canis	1	f	Mass	1847		3.98		unknown			Kellicot WE (1908) Am. J. Anat. 8:319-354
Carcharhiniformes	Triakidae	Mustelus	canis		Mustelus_canis	1	f	Mass	1890		3.73		unknown			Kellicot WE (1908) Am. J. Anat. 8:319-354
Carcharhiniformes	Triakidae	Mustelus	canis		Mustelus_canis	1	f	Mass	1913		4.21		unknown			Kellicot WE (1908) Am. J. Anat. 8:319-354
Carcharhiniformes	Triakidae	Mustelus	canis		Mustelus_canis	1	f	Mass	1948		3.51		unknown			Kellicot WE (1908) Am. J. Anat. 8:319-354
Carcharhiniformes	Triakidae	Mustelus	canis		Mustelus_canis	1	f	Mass	1952.8		4.17		unknown			Kellicot WE (1908) Am. J. Anat. 8:319-354
Carcharhiniformes	Triakidae	Mustelus	canis		Mustelus_canis	1	f	Mass	1998		4.24		unknown			Kellicot WE (1908) Am. J. Anat. 8:319-354
Carcharhiniformes	Triakidae	Mustelus	canis		Mustelus_canis	1	f	Mass	2107		3.88		unknown			Kellicot WE (1908) Am. J. Anat. 8:319-354
Carcharhiniformes	Triakidae	Mustelus	canis		Mustelus_canis	1	f	Mass	2115		3.945		unknown			Kellicot WE (1908) Am. J. Anat. 8:319-354
Carcharhiniformes	Triakidae	Mustelus	canis		Mustelus_canis	1	f	Mass	2175		4.05		unknown			Kellicot WE (1908) Am. J. Anat. 8:319-354
Carcharhiniformes	Triakidae	Mustelus	canis		Mustelus_canis	1	f	Mass	2219		4.24		unknown			Kellicot WE (1908) Am. J. Anat. 8:319-354
Carcharhiniformes	Triakidae	Mustelus	canis		Mustelus_canis	1	f	Mass	2266		4.46		unknown			Kellicot WE (1908) Am. J. Anat. 8:319-354
Carcharhiniformes	Triakidae	Mustelus	canis		Mustelus_canis	1	f	Mass	2290		3.83		unknown			Kellicot WE (1908) Am. J. Anat. 8:319-354
Carcharhiniformes	Triakidae	Mustelus	canis		Mustelus_canis	1	f	Mass	2330.5		4.36		unknown			Kellicot WE (1908) Am. J. Anat. 8:319-354
Carcharhiniformes	Triakidae	Mustelus	canis		Mustelus_canis	1	f	Mass	2332		4.29		unknown			Kellicot WE (1908) Am. J. Anat. 8:319-354
Carcharhiniformes	Triakidae	Mustelus	canis		Mustelus_canis	1	f	Mass	2380		4.35		unknown			Kellicot WE (1908) Am. J. Anat. 8:319-354
Carcharhiniformes	Triakidae	Mustelus	canis		Mustelus_canis	1	f	Mass	2394.3		4.39		unknown			Kellicot WE (1908) Am. J. Anat. 8:319-354
Carcharhiniformes	Triakidae	Mustelus	canis		Mustelus_canis	1	f	Mass	2427.5		4.39		unknown			Kellicot WE (1908) Am. J. Anat. 8:319-354
Carcharhiniformes	Triakidae	Mustelus	canis		Mustelus_canis	1	f	Mass	2432		3.57		unknown			Kellicot WE (1908) Am. J. Anat. 8:319-354
Carcharhiniformes	Triakidae	Mustelus	canis		Mustelus_canis	1	f	Mass	2534		4.24		unknown			Kellicot WE (1908) Am. J. Anat. 8:319-354
Carcharhiniformes	Triakidae	Mustelus	canis		Mustelus_canis	1	f	Mass	2610.7		4.63		unknown			Kellicot WE (1908) Am. J. Anat. 8:319-354
Carcharhiniformes	Triakidae	Mustelus	canis		Mustelus_canis	1	f	Mass	2642		4.3		unknown			Kellicot WE (1908) Am. J. Anat. 8:319-354
Carcharhiniformes	Triakidae	Mustelus	canis		Mustelus_canis	1	f	Mass	2652		4.815		unknown			Kellicot WE (1908) Am. J. Anat. 8:319-354
Carcharhiniformes	Triakidae	Mustelus	canis		Mustelus_canis	1	f	Mass	2865		4.3		unknown			Kellicot WE (1908) Am. J. Anat. 8:319-354
Carcharhiniformes	Triakidae	Mustelus	canis		Mustelus_canis	1	f	Mass	2900		4.52		unknown			Kellicot WE (1908) Am. J. Anat. 8:319-354
Carcharhiniformes	Triakidae	Mustelus	canis		Mustelus_canis	1	f	Mass	2911		4.94		unknown			Kellicot WE (1908) Am. J. Anat. 8:319-354
Carcharhiniformes	Triakidae	Mustelus	canis		Mustelus_canis	1	f	Mass	2960		4.57		unknown			Kellicot WE (1908) Am. J. Anat. 8:319-354
Carcharhiniformes	Triakidae	Mustelus	canis		Mustelus_canis	1	f	Mass	3001		4.62		unknown			Kellicot WE (1908) Am. J. Anat. 8:319-354
Carcharhiniformes	Triakidae	Mustelus	canis		Mustelus_canis	1	f	Mass	3039		5.33		unknown			Kellicot WE (1908) Am. J. Anat. 8:319-354
Carcharhiniformes	Triakidae	Mustelus	canis		Mustelus_canis	1	f	Mass	3114		4.73		unknown			Kellicot WE (1908) Am. J. Anat. 8:319-354
Carcharhiniformes	Triakidae	Mustelus	canis		Mustelus_canis	1	f	Mass	3250		4.61		unknown			Kellicot WE (1908) Am. J. Anat. 8:319-354
Carcharhiniformes	Triakidae	Mustelus	canis		Mustelus_canis	1	f	Mass	3304.5		4.745		unknown			Kellicot WE (1908) Am. J. Anat. 8:319-354
Carcharhiniformes	Triakidae	Mustelus	canis		Mustelus_canis	1	f	Mass	3312		4.8		unknown			Kellicot WE (1908) Am. J. Anat. 8:319-354
Carcharhiniformes	Triakidae	Mustelus	canis		Mustelus_canis	1	f	Mass	3490		4.8		unknown			Kellicot WE (1908) Am. J. Anat. 8:319-354
Carcharhiniformes	Triakidae	Mustelus	canis		Mustelus_canis	1	f	Mass	3513		4.87		unknown			Kellicot WE (1908) Am. J. Anat. 8:319-354
Carcharhiniformes	Triakidae	Mustelus	canis		Mustelus_canis	1	f	Mass	3522		4.63		unknown			Kellicot WE (1908) Am. J. Anat. 8:319-354
Carcharhiniformes	Triakidae	Mustelus	canis		Mustelus_canis	1	f	Mass	3581		4.71		unknown			Kellicot WE (1908) Am. J. Anat. 8:319-354
Carcharhiniformes	Triakidae	Mustelus	canis		Mustelus_canis	1	f	Mass	3609		4.82		unknown			Kellicot WE (1908) Am. J. Anat. 8:319-354
Carcharhiniformes	Triakidae	Mustelus	canis		Mustelus_canis	1	f	Mass	3638		5.08		unknown			Kellicot WE (1908) Am. J. Anat. 8:319-354
Carcharhiniformes	Triakidae	Mustelus	canis		Mustelus_canis	1	f	Mass	3760		5.01		unknown			Kellicot WE (1908) Am. J. Anat. 8:319-354
Carcharhiniformes	Triakidae	Mustelus	canis		Mustelus_canis	1	f	Mass	3810		5.34		unknown			Kellicot WE (1908) Am. J. Anat. 8:319-354
Carcharhiniformes	Triakidae	Mustelus	canis		Mustelus_canis	1	f	Mass	3995		4.91		unknown			Kellicot WE (1908) Am. J. Anat. 8:319-354
Carcharhiniformes	Triakidae	Mustelus	canis		Mustelus_canis	1	f	Mass	4152.5		5.28		unknown			Kellicot WE (1908) Am. J. Anat. 8:319-354
Carcharhiniformes	Triakidae	Mustelus	canis		Mustelus_canis	1	f	Mass	4172		5.08		unknown			Kellicot WE (1908) Am. J. Anat. 8:319-354
Carcharhiniformes	Triakidae	Mustelus	canis		Mustelus_canis	1	f	Mass	4264.5		5.35		unknown			Kellicot WE (1908) Am. J. Anat. 8:319-354
Carcharhiniformes	Triakidae	Mustelus	canis		Mustelus_canis	1	f	Mass	4275		5.63		unknown			Kellicot WE (1908) Am. J. Anat. 8:319-354
Carcharhiniformes	Triakidae	Mustelus	canis		Mustelus_canis	1	f	Mass	4420		5.105		unknown			Kellicot WE (1908) Am. J. Anat. 8:319-354
Carcharhiniformes	Triakidae	Mustelus	canis		Mustelus_canis	1	f	Mass	4510		5.16		unknown			Kellicot WE (1908) Am. J. Anat. 8:319-354
Carcharhiniformes	Triakidae	Mustelus	canis		Mustelus_canis	1	f	Mass	4540		5.39		unknown			Kellicot WE (1908) Am. J. Anat. 8:319-354
Carcharhiniformes	Triakidae	Mustelus	canis		Mustelus_canis	1	f	Mass	4550		5.48		unknown			Kellicot WE (1908) Am. J. Anat. 8:319-354
Carcharhiniformes	Triakidae	Mustelus	canis		Mustelus_canis	1	f	Mass	4600		5.32		unknown			Kellicot WE (1908) Am. J. Anat. 8:319-354
Carcharhiniformes	Triakidae	Mustelus	canis		Mustelus_canis	1	f	Mass	4862		5.68		unknown			Kellicot WE (1908) Am. J. Anat. 8:319-354
Carcharhiniformes	Triakidae	Mustelus	canis		Mustelus_canis	1	f	Mass	4863		4.98		unknown			Kellicot WE (1908) Am. J. Anat. 8:319-354
Carcharhiniformes	Triakidae	Mustelus	canis		Mustelus_canis	1	f	Mass	5634.6		5.51		unknown			Kellicot WE (1908) Am. J. Anat. 8:319-354
Carcharhiniformes	Triakidae	Mustelus	canis		Mustelus_canis	1	f	Mass	5850		5.95		unknown			Kellicot WE (1908) Am. J. Anat. 8:319-354
Carcharhiniformes	Triakidae	Mustelus	canis		Mustelus_canis	1	f	Mass	6123.6		5.55		unknown			Kellicot WE (1908) Am. J. Anat. 8:319-354
Carcharhiniformes	Triakidae	Mustelus	canis		Mustelus_canis	1	f	Mass	6633		5.98		unknown			Kellicot WE (1908) Am. J. Anat. 8:319-354
Carcharhiniformes	Triakidae	Mustelus	canis		Mustelus_canis	1	f	Mass	6790		5.915		unknown			Kellicot WE (1908) Am. J. Anat. 8:319-354
Carcharhiniformes	Triakidae	Mustelus	canis		Mustelus_canis	1	f	Mass	8434		7.2		unknown			Kellicot WE (1908) Am. J. Anat. 8:319-354
Carcharhiniformes	Triakidae	Mustelus	canis		Mustelus_canis	1	m	Mass	69.5		0.77		unknown			Kellicot WE (1908) Am. J. Anat. 8:319-354
Carcharhiniformes	Triakidae	Mustelus	canis		Mustelus_canis	1	m	Mass	71.3		0.885		unknown			Kellicot WE (1908) Am. J. Anat. 8:319-354
Carcharhiniformes	Triakidae	Mustelus	canis		Mustelus_canis	1	m	Mass	71.8		0.805		unknown			Kellicot WE (1908) Am. J. Anat. 8:319-354
Carcharhiniformes	Triakidae	Mustelus	canis		Mustelus_canis	1	m	Mass	76.7		0.81		unknown			Kellicot WE (1908) Am. J. Anat. 8:319-354
Carcharhiniformes	Triakidae	Mustelus	canis		Mustelus_canis	1	m	Mass	78.2		0.84		unknown			Kellicot WE (1908) Am. J. Anat. 8:319-354
Carcharhiniformes	Triakidae	Mustelus	canis		Mustelus_canis	1	m	Mass	78.8		0.85		unknown			Kellicot WE (1908) Am. J. Anat. 8:319-354
Carcharhiniformes	Triakidae	Mustelus	canis		Mustelus_canis	1	m	Mass	79.1		0.851		unknown			Kellicot WE (1908) Am. J. Anat. 8:319-354
Carcharhiniformes	Triakidae	Mustelus	canis		Mustelus_canis	1	m	Mass	80.3		0.86		unknown			Kellicot WE (1908) Am. J. Anat. 8:319-354
Carcharhiniformes	Triakidae	Mustelus	canis		Mustelus_canis	1	m	Mass	124.6		1.04		unknown			Kellicot WE (1908) Am. J. Anat. 8:319-354
Carcharhiniformes	Triakidae	Mustelus	canis		Mustelus_canis	1	m	Mass	128.8		0.99		unknown			Kellicot WE (1908) Am. J. Anat. 8:319-354
Carcharhiniformes	Triakidae	Mustelus	canis		Mustelus_canis	1	m	Mass	157.3		1.11		unknown			Kellicot WE (1908) Am. J. Anat. 8:319-354
Carcharhiniformes	Triakidae	Mustelus	canis		Mustelus_canis	1	m	Mass	160.9		1.18		unknown			Kellicot WE (1908) Am. J. Anat. 8:319-354
Carcharhiniformes	Triakidae	Mustelus	canis		Mustelus_canis	1	m	Mass	172.5		1.22		unknown			Kellicot WE (1908) Am. J. Anat. 8:319-354
Carcharhiniformes	Triakidae	Mustelus	canis		Mustelus_canis	1	m	Mass	186		1.14		unknown			Kellicot WE (1908) Am. J. Anat. 8:319-354
Carcharhiniformes	Triakidae	Mustelus	canis		Mustelus_canis	1	m	Mass	198.5		1.17		unknown			Kellicot WE (1908) Am. J. Anat. 8:319-354
Carcharhiniformes	Triakidae	Mustelus	canis		Mustelus_canis	1	m	Mass	214.8		1.36		unknown			Kellicot WE (1908) Am. J. Anat. 8:319-354
Carcharhiniformes	Triakidae	Mustelus	canis		Mustelus_canis	1	m	Mass	223		1.35		unknown			Kellicot WE (1908) Am. J. Anat. 8:319-354
Carcharhiniformes	Triakidae	Mustelus	canis		Mustelus_canis	1	m	Mass	232.5		1.35		unknown			Kellicot WE (1908) Am. J. Anat. 8:319-354
Carcharhiniformes	Triakidae	Mustelus	canis		Mustelus_canis	1	m	Mass	242.5		1.415		unknown			Kellicot WE (1908) Am. J. Anat. 8:319-354
Carcharhiniformes	Triakidae	Mustelus	canis		Mustelus_canis	1	m	Mass	248.2		1.33		unknown			Kellicot WE (1908) Am. J. Anat. 8:319-354
Carcharhiniformes	Triakidae	Mustelus	canis		Mustelus_canis	1	m	Mass	252		1.35		unknown			Kellicot WE (1908) Am. J. Anat. 8:319-354
Carcharhiniformes	Triakidae	Mustelus	canis		Mustelus_canis	1	m	Mass	279		1.23		unknown			Kellicot WE (1908) Am. J. Anat. 8:319-354
Carcharhiniformes	Triakidae	Mustelus	canis		Mustelus_canis	1	m	Mass	282		1.45		unknown			Kellicot WE (1908) Am. J. Anat. 8:319-354
Carcharhiniformes	Triakidae	Mustelus	canis		Mustelus_canis	1	m	Mass	348		1.51		unknown			Kellicot WE (1908) Am. J. Anat. 8:319-354
Carcharhiniformes	Triakidae	Mustelus	canis		Mustelus_canis	1	m	Mass	268.6		2.08		unknown			Kellicot WE (1908) Am. J. Anat. 8:319-354
Carcharhiniformes	Triakidae	Mustelus	canis		Mustelus_canis	1	m	Mass	425.7		2.065		unknown			Kellicot WE (1908) Am. J. Anat. 8:319-354
Carcharhiniformes	Triakidae	Mustelus	canis		Mustelus_canis	1	m	Mass	435		2.21		unknown			Kellicot WE (1908) Am. J. Anat. 8:319-354
Carcharhiniformes	Triakidae	Mustelus	canis		Mustelus_canis	1	m	Mass	437		2.21		unknown			Kellicot WE (1908) Am. J. Anat. 8:319-354
Carcharhiniformes	Triakidae	Mustelus	canis		Mustelus_canis	1	m	Mass	458		2.085		unknown			Kellicot WE (1908) Am. J. Anat. 8:319-354
Carcharhiniformes	Triakidae	Mustelus	canis		Mustelus_canis	1	m	Mass	528		2.19		unknown			Kellicot WE (1908) Am. J. Anat. 8:319-354
Carcharhiniformes	Triakidae	Mustelus	canis		Mustelus_canis	1	m	Mass	560.5		2.23		unknown			Kellicot WE (1908) Am. J. Anat. 8:319-354
Carcharhiniformes	Triakidae	Mustelus	canis		Mustelus_canis	1	m	Mass	594		2.21		unknown			Kellicot WE (1908) Am. J. Anat. 8:319-354
Carcharhiniformes	Triakidae	Mustelus	canis		Mustelus_canis	1	m	Mass	616.3		2.625		unknown			Kellicot WE (1908) Am. J. Anat. 8:319-354
Carcharhiniformes	Triakidae	Mustelus	canis		Mustelus_canis	1	m	Mass	632.7		2.78		unknown			Kellicot WE (1908) Am. J. Anat. 8:319-354
Carcharhiniformes	Triakidae	Mustelus	canis		Mustelus_canis	1	m	Mass	678.3		2.33		unknown			Kellicot WE (1908) Am. J. Anat. 8:319-354
Carcharhiniformes	Triakidae	Mustelus	canis		Mustelus_canis	1	m	Mass	707		2.44		unknown			Kellicot WE (1908) Am. J. Anat. 8:319-354
Carcharhiniformes	Triakidae	Mustelus	canis		Mustelus_canis	1	m	Mass	735		2.555		unknown			Kellicot WE (1908) Am. J. Anat. 8:319-354
Carcharhiniformes	Triakidae	Mustelus	canis		Mustelus_canis	1	m	Mass	793.5		2.92		unknown			Kellicot WE (1908) Am. J. Anat. 8:319-354
Carcharhiniformes	Triakidae	Mustelus	canis		Mustelus_canis	1	m	Mass	816.7		2.48		unknown			Kellicot WE (1908) Am. J. Anat. 8:319-354
Carcharhiniformes	Triakidae	Mustelus	canis		Mustelus_canis	1	m	Mass	818		2.25		unknown			Kellicot WE (1908) Am. J. Anat. 8:319-354
Carcharhiniformes	Triakidae	Mustelus	canis		Mustelus_canis	1	m	Mass	839		2.76		unknown			Kellicot WE (1908) Am. J. Anat. 8:319-354
Carcharhiniformes	Triakidae	Mustelus	canis		Mustelus_canis	1	m	Mass	842		2.68		unknown			Kellicot WE (1908) Am. J. Anat. 8:319-354
Carcharhiniformes	Triakidae	Mustelus	canis		Mustelus_canis	1	m	Mass	845.5		2.66		unknown			Kellicot WE (1908) Am. J. Anat. 8:319-354
Carcharhiniformes	Triakidae	Mustelus	canis		Mustelus_canis	1	m	Mass	863.7		2.95		unknown			Kellicot WE (1908) Am. J. Anat. 8:319-354
Carcharhiniformes	Triakidae	Mustelus	canis		Mustelus_canis	1	m	Mass	900.4		2.76		unknown			Kellicot WE (1908) Am. J. Anat. 8:319-354
Carcharhiniformes	Triakidae	Mustelus	canis		Mustelus_canis	1	m	Mass	912.5		2.81		unknown			Kellicot WE (1908) Am. J. Anat. 8:319-354
Carcharhiniformes	Triakidae	Mustelus	canis		Mustelus_canis	1	m	Mass	938		2.365		unknown			Kellicot WE (1908) Am. J. Anat. 8:319-354
Carcharhiniformes	Triakidae	Mustelus	canis		Mustelus_canis	1	m	Mass	946		2.92		unknown			Kellicot WE (1908) Am. J. Anat. 8:319-354
Carcharhiniformes	Triakidae	Mustelus	canis		Mustelus_canis	1	m	Mass	958		2.98		unknown			Kellicot WE (1908) Am. J. Anat. 8:319-354
Carcharhiniformes	Triakidae	Mustelus	canis		Mustelus_canis	1	m	Mass	970.8		2.99		unknown			Kellicot WE (1908) Am. J. Anat. 8:319-354
Carcharhiniformes	Triakidae	Mustelus	canis		Mustelus_canis	1	m	Mass	999.5		2.58		unknown			Kellicot WE (1908) Am. J. Anat. 8:319-354
Carcharhiniformes	Triakidae	Mustelus	canis		Mustelus_canis	1	m	Mass	1024.5		3.035		unknown			Kellicot WE (1908) Am. J. Anat. 8:319-354
Carcharhiniformes	Triakidae	Mustelus	canis		Mustelus_canis	1	m	Mass	1087.5		2.95		unknown			Kellicot WE (1908) Am. J. Anat. 8:319-354
Carcharhiniformes	Triakidae	Mustelus	canis		Mustelus_canis	1	m	Mass	1088		2.87		unknown			Kellicot WE (1908) Am. J. Anat. 8:319-354
Carcharhiniformes	Triakidae	Mustelus	canis		Mustelus_canis	1	m	Mass	1106		3.02		unknown			Kellicot WE (1908) Am. J. Anat. 8:319-354
Carcharhiniformes	Triakidae	Mustelus	canis		Mustelus_canis	1	m	Mass	1162		2.97		unknown			Kellicot WE (1908) Am. J. Anat. 8:319-354
Carcharhiniformes	Triakidae	Mustelus	canis		Mustelus_canis	1	m	Mass	1208.4		3.028		unknown			Kellicot WE (1908) Am. J. Anat. 8:319-354
Carcharhiniformes	Triakidae	Mustelus	canis		Mustelus_canis	1	m	Mass	1221.3		3.18		unknown			Kellicot WE (1908) Am. J. Anat. 8:319-354
Carcharhiniformes	Triakidae	Mustelus	canis		Mustelus_canis	1	m	Mass	1259.5		3.09		unknown			Kellicot WE (1908) Am. J. Anat. 8:319-354
Carcharhiniformes	Triakidae	Mustelus	canis		Mustelus_canis	1	m	Mass	1277		2.99		unknown			Kellicot WE (1908) Am. J. Anat. 8:319-354
Carcharhiniformes	Triakidae	Mustelus	canis		Mustelus_canis	1	m	Mass	1291		3.325		unknown			Kellicot WE (1908) Am. J. Anat. 8:319-354
Carcharhiniformes	Triakidae	Mustelus	canis		Mustelus_canis	1	m	Mass	1300		3.55		unknown			Kellicot WE (1908) Am. J. Anat. 8:319-354
Carcharhiniformes	Triakidae	Mustelus	canis		Mustelus_canis	1	m	Mass	1315.5		3.47		unknown			Kellicot WE (1908) Am. J. Anat. 8:319-354
Carcharhiniformes	Triakidae	Mustelus	canis		Mustelus_canis	1	m	Mass	1338.5		3.84		unknown			Kellicot WE (1908) Am. J. Anat. 8:319-354
Carcharhiniformes	Triakidae	Mustelus	canis		Mustelus_canis	1	m	Mass	1370		3.21		unknown			Kellicot WE (1908) Am. J. Anat. 8:319-354
Carcharhiniformes	Triakidae	Mustelus	canis		Mustelus_canis	1	m	Mass	1400		3.5		unknown			Kellicot WE (1908) Am. J. Anat. 8:319-354
Carcharhiniformes	Triakidae	Mustelus	canis		Mustelus_canis	1	m	Mass	1462		3.53		unknown			Kellicot WE (1908) Am. J. Anat. 8:319-354
Carcharhiniformes	Triakidae	Mustelus	canis		Mustelus_canis	1	m	Mass	1463		3.655		unknown			Kellicot WE (1908) Am. J. Anat. 8:319-354
Carcharhiniformes	Triakidae	Mustelus	canis		Mustelus_canis	1	m	Mass	1468.5		3.92		unknown			Kellicot WE (1908) Am. J. Anat. 8:319-354
Carcharhiniformes	Triakidae	Mustelus	canis		Mustelus_canis	1	m	Mass	1471		3.42		unknown			Kellicot WE (1908) Am. J. Anat. 8:319-354
Carcharhiniformes	Triakidae	Mustelus	canis		Mustelus_canis	1	m	Mass	1481		3.64		unknown			Kellicot WE (1908) Am. J. Anat. 8:319-354
Carcharhiniformes	Triakidae	Mustelus	canis		Mustelus_canis	1	m	Mass	1495		3.47		unknown			Kellicot WE (1908) Am. J. Anat. 8:319-354
Carcharhiniformes	Triakidae	Mustelus	canis		Mustelus_canis	1	m	Mass	1512.3		3.55		unknown			Kellicot WE (1908) Am. J. Anat. 8:319-354
Carcharhiniformes	Triakidae	Mustelus	canis		Mustelus_canis	1	m	Mass	1521		3.87		unknown			Kellicot WE (1908) Am. J. Anat. 8:319-354
Carcharhiniformes	Triakidae	Mustelus	canis		Mustelus_canis	1	m	Mass	1529.5		3.52		unknown			Kellicot WE (1908) Am. J. Anat. 8:319-354
Carcharhiniformes	Triakidae	Mustelus	canis		Mustelus_canis	1	m	Mass	1567.7		4.17		unknown			Kellicot WE (1908) Am. J. Anat. 8:319-354
Carcharhiniformes	Triakidae	Mustelus	canis		Mustelus_canis	1	m	Mass	1625		3.71		unknown			Kellicot WE (1908) Am. J. Anat. 8:319-354
Carcharhiniformes	Triakidae	Mustelus	canis		Mustelus_canis	1	m	Mass	1651		3.32		unknown			Kellicot WE (1908) Am. J. Anat. 8:319-354
Carcharhiniformes	Triakidae	Mustelus	canis		Mustelus_canis	1	m	Mass	1655		4.235		unknown			Kellicot WE (1908) Am. J. Anat. 8:319-354
Carcharhiniformes	Triakidae	Mustelus	canis		Mustelus_canis	1	m	Mass	1749		3.62		unknown			Kellicot WE (1908) Am. J. Anat. 8:319-354
Carcharhiniformes	Triakidae	Mustelus	canis		Mustelus_canis	1	m	Mass	1756		3.82		unknown			Kellicot WE (1908) Am. J. Anat. 8:319-354
Carcharhiniformes	Triakidae	Mustelus	canis		Mustelus_canis	1	m	Mass	1760		3.51		unknown			Kellicot WE (1908) Am. J. Anat. 8:319-354
Carcharhiniformes	Triakidae	Mustelus	canis		Mustelus_canis	1	m	Mass	1760.6		4.13		unknown			Kellicot WE (1908) Am. J. Anat. 8:319-354
Carcharhiniformes	Triakidae	Mustelus	canis		Mustelus_canis	1	m	Mass	1821		4.095		unknown			Kellicot WE (1908) Am. J. Anat. 8:319-354
Carcharhiniformes	Triakidae	Mustelus	canis		Mustelus_canis	1	m	Mass	1860		3.64		unknown			Kellicot WE (1908) Am. J. Anat. 8:319-354
Carcharhiniformes	Triakidae	Mustelus	canis		Mustelus_canis	1	m	Mass	1914.5		4.01		unknown			Kellicot WE (1908) Am. J. Anat. 8:319-354
Carcharhiniformes	Triakidae	Mustelus	canis		Mustelus_canis	1	m	Mass	1975.9		3.89		unknown			Kellicot WE (1908) Am. J. Anat. 8:319-354
Carcharhiniformes	Triakidae	Mustelus	canis		Mustelus_canis	1	m	Mass	1986		4.88		unknown			Kellicot WE (1908) Am. J. Anat. 8:319-354
Carcharhiniformes	Triakidae	Mustelus	canis		Mustelus_canis	1	m	Mass	2002		3.98		unknown			Kellicot WE (1908) Am. J. Anat. 8:319-354
Carcharhiniformes	Triakidae	Mustelus	canis		Mustelus_canis	1	m	Mass	2046		4.385		unknown			Kellicot WE (1908) Am. J. Anat. 8:319-354
Carcharhiniformes	Triakidae	Mustelus	canis		Mustelus_canis	1	m	Mass	2046		4.24		unknown			Kellicot WE (1908) Am. J. Anat. 8:319-354
Carcharhiniformes	Triakidae	Mustelus	canis		Mustelus_canis	1	m	Mass	2070.5		4.06		unknown			Kellicot WE (1908) Am. J. Anat. 8:319-354
Carcharhiniformes	Triakidae	Mustelus	canis		Mustelus_canis	1	m	Mass	2130		4.46		unknown			Kellicot WE (1908) Am. J. Anat. 8:319-354
Carcharhiniformes	Triakidae	Mustelus	canis		Mustelus_canis	1	m	Mass	2185.5		4.28		unknown			Kellicot WE (1908) Am. J. Anat. 8:319-354
Carcharhiniformes	Triakidae	Mustelus	canis		Mustelus_canis	1	m	Mass	2197		4.15		unknown			Kellicot WE (1908) Am. J. Anat. 8:319-354
Carcharhiniformes	Triakidae	Mustelus	canis		Mustelus_canis	1	m	Mass	2398.5		4.81		unknown			Kellicot WE (1908) Am. J. Anat. 8:319-354
Carcharhiniformes	Triakidae	Mustelus	canis		Mustelus_canis	1	m	Mass	2464.5		4.74		unknown			Kellicot WE (1908) Am. J. Anat. 8:319-354
Carcharhiniformes	Triakidae	Mustelus	canis		Mustelus_canis	1	m	Mass	2482.5		4.37		unknown			Kellicot WE (1908) Am. J. Anat. 8:319-354
Carcharhiniformes	Triakidae	Mustelus	canis		Mustelus_canis	1	m	Mass	2563		4.02		unknown			Kellicot WE (1908) Am. J. Anat. 8:319-354
Carcharhiniformes	Triakidae	Mustelus	canis		Mustelus_canis	1	m	Mass	2590		4.8		unknown			Kellicot WE (1908) Am. J. Anat. 8:319-354
Carcharhiniformes	Triakidae	Mustelus	canis		Mustelus_canis	1	m	Mass	2651		4.99		unknown			Kellicot WE (1908) Am. J. Anat. 8:319-354
Carcharhiniformes	Triakidae	Mustelus	canis		Mustelus_canis	1	m	Mass	2791		4.77		unknown			Kellicot WE (1908) Am. J. Anat. 8:319-354
Carcharhiniformes	Triakidae	Mustelus	canis		Mustelus_canis	1	m	Mass	3010.5		5.38		unknown			Kellicot WE (1908) Am. J. Anat. 8:319-354
Carcharhiniformes	Triakidae	Mustelus	canis		Mustelus_canis	1	unkwon	Mass	6500		8.31		unknown			Northcutt RG (1977) Am Zool 17:411-429
Carcharhiniformes	Triakidae	Mustelus	canis		Mustelus_canis	1	unkwon	Mass	6500		7.15		adult			Yopak KE et al (2007) Brain Behav Evol 69:280-300
Carcharhiniformes	Triakidae	Mustelus	lenticulatus		Mustelus_lenticulatus	3	unkwon	Mass	2288.57	760	5.97	1.17	adult			Yopak KE et al (2007) Brain Behav Evol 69:280-300
Chimaeriformes	Callorhinchidae	Callorhinchus	milii		Callorhinchus_milii	3	unkwon	Mass	2850	1710	3.12	0.72	adult			Yopak KE et al (2007) Brain Behav Evol 69:280-300
Chimaeriformes	Chimaeridae	Chimaera	lignaria		Chimaera_lignaria	1	unkwon	Mass	14400		7.24		adult			Yopak KE and Montgomery JC (2008) Brain Behav Evol 71:287-304
Chimaeriformes	Chimaeridae	Chimaera	monstrosa		Chimaera_monstrosa	1	unkwon	Mass	1176		3.274		unknown	Irish Sea		Bauchot R et al (1995) Cybium 19:153-165
Chimaeriformes	Chimaeridae	Hydrolagus	bemisi		Hydrolagus_bemisi	2	unkwon	Mass	2145		2.99		unknown			Yopak KE and Montgomery JC (2008) Brain Behav Evol 71:287-304
Chimaeriformes	Chimaeridae	Hydrolagus	mirabilis		Hydrolagus_mirabilis	1	unkwon	Mass	515		1.863		unknown	Irish Sea		Bauchot R et al (1995) Cybium 19:153-165
Chimaeriformes	Chimaeridae	Hydrolagus	novaezealandiae		Hydrolagus_novaezealandiae	2	unkwon	Mass	1120		2.9		unknown			Yopak KE and Montgomery JC (2008) Brain Behav Evol 71:287-304
Chimaeriformes	Rhinochimaeridae	Harriotta	raleighana		Harriotta_raleighana	3	unkwon	Mass	2205		3.1		unknown			Yopak KE and Montgomery JC (2008) Brain Behav Evol 71:287-304
Chimaeriformes	Rhinochimaeridae	Rhinochimaera	pacifica		Rhinochimaera_pacifica	2	unkwon	Mass	2975		2.25		adult			Yopak KE and Montgomery JC (2008) Brain Behav Evol 71:287-304
Heterodontiformes	Heterodontidae	Heterodontus	francisci		Heterodontus_francisci	1	unkwon	Mass	2930		4.3		unknown			Northcutt RG (1977) Am Zool 17:411-429
Hexanchiformes	Chlamydoselachidae	Chlamydoselachus	anguineus		Chlamydoselachus_anguineus	1	unkwon	Mass	3550		3.39		unknown			Myagkov NA (1991) J Hinforsch 32:553-561
Hexanchiformes	Hexanchidae	Heptranchias	perlo		Heptranchias_perlo	1	unkwon	Mass	2120		1.94		unknown			Myagkov NA (1991) J Hinforsch 32:553-561
Hexanchiformes	Hexanchidae	Hexanchus	griseus		Hexanchus_griseus	1	unkwon	Mass	22000		9.989		unknown	Irish Sea		Bauchot R et al (1995) Cybium 19:153-165
Hexanchiformes	Hexanchidae	Hexanchus	griseus		Hexanchus_griseus	1	unkwon	Mass	5570		4.56		unknown			Myagkov NA (1991) J Hinforsch 32:553-561
Hexanchiformes	Hexanchidae	Hexanchus	nakamurai		Hexanchus_nakamurai	1	unkwon	Mass	20200		9		unknown	Irish Sea		Bauchot R et al (1995) Cybium 19:153-165
Hexanchiformes	Hexanchidae	Notorynchus	cepedianus		Notorynchus_cepedianus	3	unkwon	Mass	22171.3	5900	5.7	0.95	adult			Yopak KE et al (2007) Brain Behav Evol 69:280-300
Lamniformes	Alopiidae	Alopias	superciliosus		Alopias_superciliosus	1	unkwon	Mass	62730		30.2		adult			Yopak KE et al (2007) Brain Behav Evol 69:280-300
Lamniformes	Alopiidae	Alopias	vulpinus		Alopias_vulpinus	1	unkwon	Mass	5830		11.13		Juvenile			Yopak KE et al (2007) Brain Behav Evol 69:280-300
Lamniformes	Cetorhinidae	Cetorhinus	maximus		Cetorhinus_maximus	1	m	Mass	385000		20.7		unknown			Kruska DCT (1988) Brain Behav Evol 32:353-363.; Yopak KE, Frank LR (2009) Brain Behav Evol 74:121-142
Lamniformes	Lamnidae	Carcharodon	carcharias		Carcharodon_carcharias	3	unkwon	Mass	727270		29.53		Sub-adult			Yopak KE et al (2007) Brain Behav Evol 69:280-300
Lamniformes	Lamnidae	Isurus	oxyrinchus		Isurus_oxyrinchus	3	unkwon	Mass	186530	8240	25.59	3.91	adult			Yopak KE et al (2007) Brain Behav Evol 69:280-300
Lamniformes	Megachasmidae	Megachasma	pelagios		Megachasma_pelagios	1	f	Mass	1040000		19.8		unknown			Ito H et al(1999) Copeia 1999:210-213
Lamniformes	Odontaspididae	Carcharias	taurus		Carcharias_taurus	1	f	Mass	123000		82.55		unknown	Miami, pregnant female	Carcharias littoralis	Crile G and Quiring DP (1940) Ohio J Sci 40:219-259.
Lamniformes	Odontaspididae	Carcharias	taurus		Carcharias_taurus	1	unkwon	Mass	152400		14.25		adult			Yopak KE et al (2007) Brain Behav Evol 69:280-300
Lamniformes	Pseudocarchariidae	Pseudocarcharias	kamoharai		Pseudocarcharias_kamoharai	1	unkwon	Mass	3900		4.8		adult			Yopak KE et al (2007) Brain Behav Evol 69:280-300
Myliobatiformes	Dasyatidae	Dasyatis	americana		Dasyatis_americana	1	unkwon	Mass	27500		26.45		unknown			Myagkov NA (1991) J Hinforsch 32:553-561
Myliobatiformes	Dasyatidae	Dasyatis	brevicaudata		Dasyatis_brevicaudata	1	unkwon	Mass	39000		30.34		Sub-adult			Lisney TJ et al (2008) Brain Behav Evol 72:262-282.; Yopak KE and Lisney TJ (2012) Brain, Behavior and Evolution 80:108-126.
Myliobatiformes	Dasyatidae	Dasyatis	centroura		Dasyatis_centroura	1	unkwon	Mass	5660		18.27		unknown			Northcutt RG (1978) Brain organization in the cartilaginous fishes. In: Sensory Biology of Sharks, Skates, and Rays (Hodgson ES, Mathewson RF, eds), pp 117-194. Arlington, VA: Office of Naval Research
Myliobatiformes	Dasyatidae	Dasyatis	fluviorum		Dasyatis_fluviorum	3	unkwon	Mass	2950	550	11.46	1.49	adult			Lisney TJ et al (2008) Brain Behav Evol 72:262-282.
Myliobatiformes	Dasyatidae	Dasyatis	kuhlii		Dasyatis_kuhlii	3	unkwon	Mass	1370	980	10.83	0.87	adult		Dasyatis kuhlii	Lisney TJ et al (2008) Brain Behav Evol 72:262-282.; Yopak KE and Lisney TJ (2012) Brain, Behavior and Evolution 80:108-126.
Myliobatiformes	Dasyatidae	Dasyatis	pastinaca		Dasyatis_pastinaca	1	unkwon	Mass	6800		24.872		unknown	Reunion		Bauchot R et al (1976) Copeia 2:305-310
Myliobatiformes	Dasyatidae	Dasyatis	pastinaca		Dasyatis_pastinaca	1	unkwon	Mass	6003.94		21.895		unknown			Myagkov NA (1991) J Hinforsch 32:553-561
Myliobatiformes	Dasyatidae	Dasyatis	sabina		Dasyatis_sabina	2	m	Mass	17580		54.49		unknown	Key West		Crile G and Quiring DP (1940) Ohio J Sci 40:219-259.
Myliobatiformes	Dasyatidae	Dasyatis	sabina		Dasyatis_sabina	1	unkwon	Mass	10127.5		30.26		adult			Lisney TJ et al (2008) Brain Behav Evol 72:262-282.
Myliobatiformes	Dasyatidae	Dasyatis	thetidis		Dasyatis_thetidis	4	unkwon	Mass	21000		29.47		Sub-adult			Lisney TJ et al (2008) Brain Behav Evol 72:262-282.; Yopak KE and Lisney TJ (2012) Brain, Behavior and Evolution 80:108-126.
Myliobatiformes	Dasyatidae	Himantura	fai		Himantura_fai	2	unkwon	Mass	11380		40.48		Immature			Lisney TJ et al (2008) Brain Behav Evol 72:262-282.
Myliobatiformes	Dasyatidae	Pastinachus	sephen		Pastinachus_sephen	1	unkwon	Mass	15000		23.32		Immature		Pastinachus sephen	Lisney TJ et al (2008) Brain Behav Evol 72:262-282.; Yopak KE and Lisney TJ (2012) Brain, Behavior and Evolution 80:108-126.
Myliobatiformes	Dasyatidae	Taeniura	lymma		Taeniura_lymma	1	unkwon	Mass	313		4.354		unknown	Red Sea		Bauchot R et al (1995) Cybium 19:153-165
Myliobatiformes	Dasyatidae	Taeniura	lymma		Taeniura_lymma	3	unkwon	Mass	360	80	5.68	1.43	Sub-adult			Lisney TJ et al (2008) Brain Behav Evol 72:262-282.; Yopak KE and Lisney TJ (2012) Brain, Behavior and Evolution 80:108-126.
Myliobatiformes	Gymnuridae	Gymnura	australis		Gymnura_australis	1	unkwon	Mass	2890		3.79		adult			Lisney TJ et al (2008) Brain Behav Evol 72:262-282.; Yopak KE and Lisney TJ (2012) Brain, Behavior and Evolution 80:108-126.
Myliobatiformes	Myliobatidae	Aetobatus	narinari		Aetobatus_narinari	1	unkwon	Mass	12000		22.4		unknown			Myagkov NA (1991) J Hinforsch 32:553-561
Myliobatiformes	Myliobatidae	Manta	birostris		Manta_birostris	1	f	Mass	165000		122		unknown			Ari C (2011) The Open Anatomy Journal 3:1-13.
Myliobatiformes	Myliobatidae	Mobula	japanica		Mobula_japanica	5	f	Mass	61760	13.04	58.8	8.85	unknown			Ari C (2011) The Open Anatomy Journal 3:1-13.
Myliobatiformes	Myliobatidae	Mobula	japanica		Mobula_japanica	5	m	Mass	58060	10.02	52.89	5.39	unknown			Ari C (2011) The Open Anatomy Journal 3:1-13.
Myliobatiformes	Myliobatidae	Mobula	japanica		Mobula_japanica	1	unkwon	Mass	94000		110		unknown			Fossi A (1984): Quelques aspects de la biologie des raies du genre Mobula du Golfe de Californie. Institut national des Techniques de la Mer. pp.
Myliobatiformes	Myliobatidae	Mobula	munkiana		Mobula_munkiana	1	unkwon	Mass	11800		20		unknown			Fossi A (1984): Quelques aspects de la biologie des raies du genre Mobula du Golfe de Californie. Institut national des Techniques de la Mer. pp.
Myliobatiformes	Myliobatidae	Mobula	tarapacana		Mobula_tarapacana	1	unkwon	Mass	165000		122		unknown			Fossi A (1984): Quelques aspects de la biologie des raies du genre Mobula du Golfe de Californie. Institut national des Techniques de la Mer. pp.
Myliobatiformes	Myliobatidae	Mobula	thurstoni		Mobula_thurstoni	2	m	Mass	65500	3.25	62.5	12.73	unknown			Ari C (2011) The Open Anatomy Journal 3:1-13.
Myliobatiformes	Myliobatidae	Mobula	thurstoni		Mobula_thurstoni	1	unkwon	Mass	40000		72		unknown			Fossi A (1984): Quelques aspects de la biologie des raies du genre Mobula du Golfe de Californie. Institut national des Techniques de la Mer. pp.
Myliobatiformes	Myliobatidae	Myliobatis	freminvillii		Myliobatis_freminvillii	1	unkwon	Mass	5430		14.28		unknown			Northcutt RG (1978) Brain organization in the cartilaginous fishes. In: Sensory Biology of Sharks, Skates, and Rays (Hodgson ES, Mathewson RF, eds), pp 117-194. Arlington, VA: Office of Naval Research
Myliobatiformes	Myliobatidae	Myliobatis	tenuicaudatus		Myliobatis_tenuicaudatus	3	unkwon	Mass	626.333	220	5.09	2.09	Immature			Lisney TJ et al (2008) Brain Behav Evol 72:262-282.; Yopak KE and Lisney TJ (2012) Brain, Behavior and Evolution 80:108-126.
Myliobatiformes	Platyrhinidae	Platyrhinoidis	triseriata		Platyrhinoidis_triseriata	1	unkwon	Mass	2030		1.37		unknown			Northcutt RG (1978) Brain organization in the cartilaginous fishes. In: Sensory Biology of Sharks, Skates, and Rays (Hodgson ES, Mathewson RF, eds), pp 117-194. Arlington, VA: Office of Naval Research
Myliobatiformes	Potamotrygonidae	Potamotrygon	motoro		Potamotrygon_motoro	1	unkwon	Mass	630		4.51		unknown			Northcutt RG (1977) Am Zool 17:411-429
Myliobatiformes	Urolophidae	Trygonoptera	testacea		Trygonoptera_testacea	1	unkwon	Mass	1100		3.564		adult			Lisney TJ et al (2008) Brain Behav Evol 72:262-282.
Myliobatiformes	Urolophidae	Urolophus	cruciatus		Urolophus_cruciatus	2	unkwon	Mass	705.9		2.45		adult			Yopak KE, Lisney TJ (2012) Brain, Behavior and Evolution 80:108-126.
Orectolobiformes	Brachaeluridae	Brachaelurus	waddi		Brachaelurus_waddi	1	unkwon	Mass	690		1.39		Sub-adult			Yopak KE et al (2007) Brain Behav Evol 69:280-300
Orectolobiformes	Ginglymostomatidae	Ginglymostoma	cirratum		Ginglymostoma_cirratum	1	unkwon	Mass	45300		31.65		unknown			Northcutt RG (1977) Am Zool 17:411-429
Orectolobiformes	Ginglymostomatidae	Nebrius	ferrugineus		Nebrius_ferrugineus	1	unkwon	Mass	11700		15.123		unknown			Bauchot R et al (1995) Cybium 19:153-165
Orectolobiformes	Ginglymostomatidae	Nebrius	ferrugineus		Nebrius_ferrugineus	1	unkwon	Mass	32200		15.16		adult			Yopak KE et al (2007) Brain Behav Evol 69:280-300
Orectolobiformes	Hemiscylliidae	Chiloscyllium	punctatum		Chiloscyllium_punctatum	2	unkwon	Mass	700		2.1		adult			Yopak KE et al (2007) Brain Behav Evol 69:280-300
Orectolobiformes	Hemiscylliidae	Hemiscyllium	ocellatum		Hemiscyllium_ocellatum	3	unkwon	Mass	600	100	1.96	0.17	adult			Yopak KE et al (2007) Brain Behav Evol 69:280-300
Orectolobiformes	Orectolobidae	Orectolobus	maculatus		Orectolobus_maculatus	1	unkwon	Mass	12300		3.23		adult			Yopak KE et al (2007) Brain Behav Evol 69:280-300
Orectolobiformes	Orectolobidae	Orectolobus	ornatus		Orectolobus_ornatus	5	unkwon	Mass	3410	1160	2.11	0.34	adult			Yopak KE et al (2007) Brain Behav Evol 69:280-300
Orectolobiformes	Rhincodontidae	Rhincodon	typus		Rhincodon_typus	1	m	Mass	1398500		36.12		Juvenile	Georgia Aquarium		Yopak KE, Frank LR (2009) Brain Behav Evol 74:121-142
Orectolobiformes	Rhincodontidae	Rhincodon	typus		Rhincodon_typus	1	m	Mass	1377730		34.75		Juvenile	Georgia Aquarium		Yopak KE, Frank LR (2009) Brain Behav Evol 74:121-142
Pristiophoriformes	Pristiophoridae	Pristiophorus	cirratus		Pristiophorus_cirratus	3	unkwon	Mass	1080	1100	1.66	0.79	adult			Yopak KE et al (2007) Brain Behav Evol 69:280-300
Rajiformes	Anacanthobatidae	Anacanthobatis	marmoratus		Anacanthobatis_marmoratus	1	unkwon	Mass	80		0.6		unknown			Myagkov NA (1991) J Hinforsch 32:553-561
Rajiformes	Dasyatidae	Dasyatis	garouaensis		Dasyatis_garouaensis	1	unkwon	Mass	2400		3.53		adult			Lisney TJ et al (2008) Brain Behav Evol 72:262-282.
Rajiformes	Rajidae	Amblyraja	hyperborea		Amblyraja_hyperborea	1	unkwon	Mass	2490		2.64		unknown			Myagkov NA (1991) J Hinforsch 32:553-561
Rajiformes	Rajidae	Amblyraja	radiata		Amblyraja_radiata	1	unkwon	Mass	1160		3.103		unknown	Baffin Bay		Bauchot R et al (1995) Cybium 19:153-165
Rajiformes	Rajidae	Amblyraja	radiata		Amblyraja_radiata	1	unkwon	Mass	726.5		1.40075		unknown			Nilsson GE et al (2000) Proc. R. Soc. Lond. B 267:1335-1339.
Rajiformes	Rajidae	Bathyraja	spinicauda		Bathyraja_spinicauda	1	unkwon	Mass	17200		4.68		unknown			Myagkov NA (1991) J Hinforsch 32:553-561
Rajiformes	Rajidae	Dipturus	confusus		Dipturus_confusus	1	unkwon	Mass	1066.93		2.33259		adult			Lisney TJ et al (2008) Brain Behav Evol 72:262-282.; Yopak KE and Lisney TJ (2012) Brain, Behavior and Evolution 80:108-126.
Rajiformes	Rajidae	Dipturus	innominatus		Dipturus_innominatus	3	unkwon	Mass	1500	860	2.1	0.87	adult			Lisney TJ et al (2008) Brain Behav Evol 72:262-282.
Rajiformes	Rajidae	Dipturus	nidarosiensis		Dipturus_nidarosiensis	1	unkwon	Mass	9000		7.376		unknown	Irish Sea		Bauchot R et al (1995) Cybium 19:153-165
Rajiformes	Rajidae	Dipturus	polyommata		Dipturus_polyommata	4	unkwon	Mass	229.333	40	0.88	0.03	adult			Lisney TJ et al (2008) Brain Behav Evol 72:262-282.; Yopak KE and Lisney TJ (2012) Brain, Behavior and Evolution 80:108-126.
Rajiformes	Rajidae	Leucoraja	circularis		Leucoraja_circularis	1	unkwon	Mass	2710		3.613		unknown	Irish Sea		Bauchot R et al (1995) Cybium 19:153-165
Rajiformes	Rajidae	Leucoraja	fullonica		Leucoraja_fullonica	1	unkwon	Mass	3400		4.62		unknown	Irish Sea		Bauchot R et al (1995) Cybium 19:153-165
Rajiformes	Rajidae	Leucoraja	naevus		Leucoraja_naevus	1	unkwon	Mass	1200		1.979		unknown	North Sea		Bauchot R et al (1995) Cybium 19:153-165
Rajiformes	Rajidae	Okamejei	lemprieri		Okamejei_lemprieri	3	unkwon	Mass	491.933	280	1.41	0.56	adult		Okamejei lemprieri	Lisney TJ et al (2008) Brain Behav Evol 72:262-282.
Rajiformes	Rajidae	Raja	asterias		Raja_asterias	1	unkwon	Mass	1805		3.028		unknown	Roscoff		Bauchot R et al (1976) Copeia 2:305-310
Rajiformes	Rajidae	Raja	brachyura		Raja_brachyura	1	unkwon	Mass	5500		4.534		unknown	North Sea		Bauchot R et al (1995) Cybium 19:153-165
Rajiformes	Rajidae	Raja	clavata		Raja_clavata	1	unkwon	Mass	7200		6.03		unknown	Roscoff		Bauchot R et al (1976) Copeia 2:305-310
Rajiformes	Rajidae	Raja	clavata		Raja_clavata	1	unkwon	Mass	5773.33		5.00333		unknown			Myagkov NA (1991) J Hinforsch 32:553-561
Rajiformes	Rajidae	Raja	eglanteria		Raja_eglanteria	1	unkwon	Mass	1100		1.66		unknown			Northcutt RG (1977) Am Zool 17:411-429
Rajiformes	Rajidae	Raja	microocellata		Raja_microocellata	1	unkwon	Mass	1900		2.222		unknown	North Sea		Bauchot R et al (1995) Cybium 19:153-165
Rajiformes	Rajidae	Raja	undulata		Raja_undulata	1	unkwon	Mass	4300		6.089		unknown	Roscoff		Bauchot R et al (1976) Copeia 2:305-310
Rajiformes	Rajidae	Rajella	fyllae		Rajella_fyllae	1	unkwon	Mass	1450		1.458		unknown	Baffin Bay		Bauchot R et al (1995) Cybium 19:153-165
Rajiformes	Rhinobatidae	Aptychotrema	rostrata		Aptychotrema_rostrata	1	unkwon	Mass	2100		3.026		unknown	New Caledonia		Bauchot R et al (1995) Cybium 19:153-165
Rajiformes	Rhinobatidae	Rhinobatos	annulatus		Rhinobatos_annulatus	1	unkwon	Mass	350		2.23		unknown			Myagkov NA (1991) J Hinforsch 32:553-561
Rajiformes	Rhinobatidae	Rhinobatos	batillum		Rhinobatos_batillum	1	unkwon	Mass	11720		12.796		Sub-adult		Rhinobatos typus	Lisney TJ et al (2008) Brain Behav Evol 72:262-282.; Yopak KE and Lisney TJ (2012) Brain, Behavior and Evolution 80:108-126.
Rajiformes	Rhinobatidae	Rhinobatos	productus		Rhinobatos_productus	1	unkwon	Mass	3620		9.11		unknown			Northcutt RG (1977) Am Zool 17:411-429
Squaliformes	Centrophoridae	Centrophorus	granulosus		Centrophorus_granulosus	1	unkwon	Mass	1360		3.16		unknown			Myagkov NA (1991) J Hinforsch 32:553-561
Squaliformes	Centrophoridae	Centrophorus	moluccensis		Centrophorus_moluccensis	1	unkwon	Mass	3100		3.4		unknown	Enewetak Atoll		Bauchot R et al (1995) Cybium 19:153-165
Squaliformes	Centrophoridae	Centrophorus	squamosus		Centrophorus_squamosus	1	unkwon	Mass	7700		8.917		unknown	Irish Sea		Bauchot R et al (1995) Cybium 19:153-165
Squaliformes	Centrophoridae	Centrophorus	squamosus		Centrophorus_squamosus	1	unkwon	Mass	13800		4.45		adult			Yopak KE and Montgomery JC (2008) Brain Behav Evol 71:287-304
Squaliformes	Centrophoridae	Deania	calcea		Deania_calcea	1	unkwon	Mass	5400		5.558		unknown	Irish Sea		Bauchot R et al (1995) Cybium 19:153-165
Squaliformes	Centrophoridae	Deania	calcea		Deania_calcea	3	unkwon	Mass	2025	18	3.51	0.14	adult			Yopak KE and Montgomery JC (2008) Brain Behav Evol 71:287-304
Squaliformes	Centrophoridae	Deania	quadrispinosum		Deania_quadrispinosum	1	unkwon	Mass	1750		3.47		unknown			Myagkov NA (1991) J Hinforsch 32:553-561
Squaliformes	Dalatiidae	Dalatias	licha		Dalatias_licha	1	unkwon	Mass	13034		6.717		unknown	Irish Sea		Bauchot R et al (1995) Cybium 19:153-165
Squaliformes	Dalatiidae	Dalatias	licha		Dalatias_licha	1	unkwon	Mass	24000		3.37		adult			Yopak KE et al (2007) Brain Behav Evol 69:280-300
Squaliformes	Dalatiidae	Isistius	brasiliensis		Isistius_brasiliensis	1	unkwon	Mass	540		0.37		unknown			Myagkov NA (1991) J Hinforsch 32:553-561
Squaliformes	Dalatiidae	Squaliolus	laticaudus		Squaliolus_laticaudus	1	unkwon	Mass	60		0.44		unknown			Myagkov NA (1991) J Hinforsch 32:553-561
Squaliformes	Etmopteridae	Etmopterus	baxteri		Etmopterus_baxteri	3	unkwon	Mass	2228.33	990	1.92	0.36	Sub-adult			Yopak KE and Montgomery JC (2008) Brain Behav Evol 71:287-304
Squaliformes	Etmopteridae	Etmopterus	lucifer		Etmopterus_lucifer	3	unkwon	Mass	196.667	81	0.74	0.19	adult			Yopak KE and Montgomery JC (2008) Brain Behav Evol 71:287-304
Squaliformes	Etmopteridae	Etmopterus	spinax		Etmopterus_spinax	1	unkwon	Mass	385		2.198		unknown	Reunion		Bauchot R et al (1976) Copeia 2:305-310
Squaliformes	Etmopteridae	Etmopterus	spinax		Etmopterus_spinax	1	unkwon	Mass	375		1.062		unknown	Reunion		Bauchot R et al (1995) Cybium 19:153-165
Squaliformes	Etmopteridae	Etmopterus	spinax		Etmopterus_spinax	1	unkwon	Mass	670		2.43		unknown			Myagkov NA (1991) J Hinforsch 32:553-561
Squaliformes	Oxynotidae	Oxynotus	bruniensis		Oxynotus_bruniensis	2	unkwon	Mass	2542.5		2.25		Sub-adult			Yopak KE and Montgomery JC (2008) Brain Behav Evol 71:287-304
Squaliformes	Oxynotidae	Oxynotus	paradoxus		Oxynotus_paradoxus	1	unkwon	Mass	2400		3.434		unknown	Irish Sea		Bauchot R et al (1995) Cybium 19:153-165
Squaliformes	Somniosidae	Centroscymnus	coelolepis		Centroscymnus_coelolepis	1	unkwon	Mass	12200		5.478		unknown	Irish Sea		Bauchot R et al (1995) Cybium 19:153-165
Squaliformes	Somniosidae	Centroscymnus	crepidater		Centroscymnus_crepidater	3	unkwon	Mass	1050	240	2.83	0.35	adult			Yopak KE and Montgomery JC (2008) Brain Behav Evol 71:287-304
Squaliformes	Somniosidae	Centroscymnus	cryptacanthus		Centroscymnus_cryptacanthus	2	unkwon	Mass	2757.5		3.33		adult			Yopak KE and Montgomery JC (2008) Brain Behav Evol 71:287-304
Squaliformes	Somniosidae	Proscymnodon	plunketi		Proscymnodon_plunketi	2	unkwon	Mass	6512.5		4.2		adult			Yopak KE and Montgomery JC (2008) Brain Behav Evol 71:287-304
Squaliformes	Somniosidae	Scymnodon	ringens		Scymnodon_ringens	1	unkwon	Mass	2590		5.023		unknown	Irish Sea		Bauchot R et al (1995) Cybium 19:153-165
Squaliformes	Somniosidae	Somniosus	microcephalus		Somniosus_microcephalus	1	unkwon	Mass	280000		10.29		unknown			Myagkov NA (1991) J Hinforsch 32:553-561
Squaliformes	Squalidae	Squalus	acanthias		Squalus_acanthias	1	unkwon	Mass	10625		8.77		unknown			Bauchot R et al (1976) Copeia 2:305-310
Squaliformes	Squalidae	Squalus	acanthias		Squalus_acanthias	1	unkwon	Mass	4200		3.87		unknown			Northcutt RG (1977) Am Zool 17:411-429
Squaliformes	Squalidae	Squalus	griffini		Squalus_griffini	3	unkwon	Mass	3980.33	460	4.96	0.09	adult		Squalis sp.	Yopak KE et al (2007) Brain Behav Evol 69:280-300
Squaliformes	Squalidae	Squalus	megalops		Squalus_megalops	1	unkwon	Mass	1030		2.75		unknown			Myagkov NA (1991) J Hinforsch 32:553-561
Squaliformes	Squalidae	Squalus	megalops		Squalus_megalops	1	unkwon	Mass	423.8		2.24		adult			Yopak KE et al (2007) Brain Behav Evol 69:280-300
Squaliformes	Squalidae	Squalus	melanurus		Squalus_melanurus	1	unkwon	Mass	1115		3.27		unknown			Bauchot R et al (1995) Cybium 19:153-165
Squatiniformes	Squatinidae	Squatina	squatina		Squatina_squatina	1	unkwon	Mass	6000		2.061		unknown	Roscoff		Bauchot R et al (1976) Copeia 2:305-310
Torpediniformes	Narcinidae	Narcine	tasmaniensis		Narcine_tasmaniensis	3	unkwon	Mass	220	50	0.52	0.05	adult			Lisney TJ et al (2008) Brain Behav Evol 72:262-282.; Yopak KE and Lisney TJ (2012) Brain, Behavior and Evolution 80:108-126.
Torpediniformes	Torpedinidae	Torpedo	marmorata		Torpedo_marmorata	1	f	Mass	106		0.35		unknown	Britany		Bauchot R et al (1976) Copeia 2:305-310
Torpediniformes	Torpedinidae	Torpedo	marmorata		Torpedo_marmorata	1	f	Mass	570		1.138		unknown	Britany		Bauchot R et al (1976) Copeia 2:305-310
Torpediniformes	Torpedinidae	Torpedo	marmorata		Torpedo_marmorata	1	f	Mass	2270		1.718		unknown	Britany		Bauchot R et al (1976) Copeia 2:305-310
Torpediniformes	Torpedinidae	Torpedo	marmorata		Torpedo_marmorata	1	f	Mass	3970		2.231		unknown	Britany		Bauchot R et al (1976) Copeia 2:305-310
Torpediniformes	Torpedinidae	Torpedo	marmorata		Torpedo_marmorata	1	f	Mass	1560		1.546		unknown	Britany		Bauchot R et al (1976) Copeia 2:305-310
Torpediniformes	Torpedinidae	Torpedo	marmorata		Torpedo_marmorata	1	f	Mass	1680		1.402		unknown	Britany		Bauchot R et al (1976) Copeia 2:305-310
Torpediniformes	Torpedinidae	Torpedo	marmorata		Torpedo_marmorata	1	f	Mass	4200		2.154		unknown	Britany		Bauchot R et al (1976) Copeia 2:305-310
Torpediniformes	Torpedinidae	Torpedo	marmorata		Torpedo_marmorata	1	f	Mass	925		1.007		unknown	Reunion		Bauchot R et al (1976) Copeia 2:305-310
Torpediniformes	Torpedinidae	Torpedo	marmorata		Torpedo_marmorata	1	f	Mass	845		0.943		unknown	Reunion		Bauchot R et al (1976) Copeia 2:305-310
Torpediniformes	Torpedinidae	Torpedo	marmorata		Torpedo_marmorata	1	f	Mass	43		0.263		unknown	Reunion		Bauchot R et al (1976) Copeia 2:305-310
Torpediniformes	Torpedinidae	Torpedo	marmorata		Torpedo_marmorata	1	f	Mass	233		0.651		unknown	Reunion		Bauchot R et al (1976) Copeia 2:305-310
Torpediniformes	Torpedinidae	Torpedo	marmorata		Torpedo_marmorata	1	f	Mass	187		0.528		unknown	Reunion		Bauchot R et al (1976) Copeia 2:305-310
Torpediniformes	Torpedinidae	Torpedo	marmorata		Torpedo_marmorata	1	f	Mass	400		0.944		unknown	Reunion		Bauchot R et al (1976) Copeia 2:305-310
Torpediniformes	Torpedinidae	Torpedo	marmorata		Torpedo_marmorata	1	f	Mass	260		0.721		unknown	Reunion		Bauchot R et al (1976) Copeia 2:305-310
Torpediniformes	Torpedinidae	Torpedo	marmorata		Torpedo_marmorata	1	f	Mass	270		0.797		unknown	Reunion		Bauchot R et al (1976) Copeia 2:305-310
Torpediniformes	Torpedinidae	Torpedo	marmorata		Torpedo_marmorata	1	f	Mass	37		0.233		unknown	Reunion		Bauchot R et al (1976) Copeia 2:305-310
Torpediniformes	Torpedinidae	Torpedo	marmorata		Torpedo_marmorata	1	f	Mass	1230		1.354		unknown	Reunion		Bauchot R et al (1976) Copeia 2:305-310
Torpediniformes	Torpedinidae	Torpedo	marmorata		Torpedo_marmorata	1	f	Mass	855		1.034		unknown	Reunion		Bauchot R et al (1976) Copeia 2:305-310
Torpediniformes	Torpedinidae	Torpedo	marmorata		Torpedo_marmorata	1	f	Mass	440		0.871		unknown	Reunion		Bauchot R et al (1976) Copeia 2:305-310
Torpediniformes	Torpedinidae	Torpedo	marmorata		Torpedo_marmorata	1	f	Mass	620		0.95		unknown	Reunion		Bauchot R et al (1976) Copeia 2:305-310
Torpediniformes	Torpedinidae	Torpedo	marmorata		Torpedo_marmorata	1	m	Mass	2070		1.839		unknown	Britany		Bauchot R et al (1976) Copeia 2:305-310
Torpediniformes	Torpedinidae	Torpedo	marmorata		Torpedo_marmorata	1	m	Mass	1046		1.34		unknown	Britany		Bauchot R et al (1976) Copeia 2:305-310
Torpediniformes	Torpedinidae	Torpedo	marmorata		Torpedo_marmorata	1	m	Mass	305		0.715		unknown	Britany		Bauchot R et al (1976) Copeia 2:305-310
Torpediniformes	Torpedinidae	Torpedo	marmorata		Torpedo_marmorata	1	m	Mass	912		1.246		unknown	Britany		Bauchot R et al (1976) Copeia 2:305-310
Torpediniformes	Torpedinidae	Torpedo	marmorata		Torpedo_marmorata	1	m	Mass	6000		3.58		unknown	Britany		Bauchot R et al (1976) Copeia 2:305-310
Torpediniformes	Torpedinidae	Torpedo	marmorata		Torpedo_marmorata	1	m	Mass	1190		1.31		unknown	Britany		Bauchot R et al (1976) Copeia 2:305-310
Torpediniformes	Torpedinidae	Torpedo	torpedo		Torpedo_torpedo	1	unkwon	Mass	345		0.78		unknown			Crile G and Quiring DP (1940) Ohio J Sci 40:219-259.
